# Supplementary material
Source: PubMed Central journal article supplement (PMC10564481)
Supplement: media-1.pdf [file media-1.pdf]

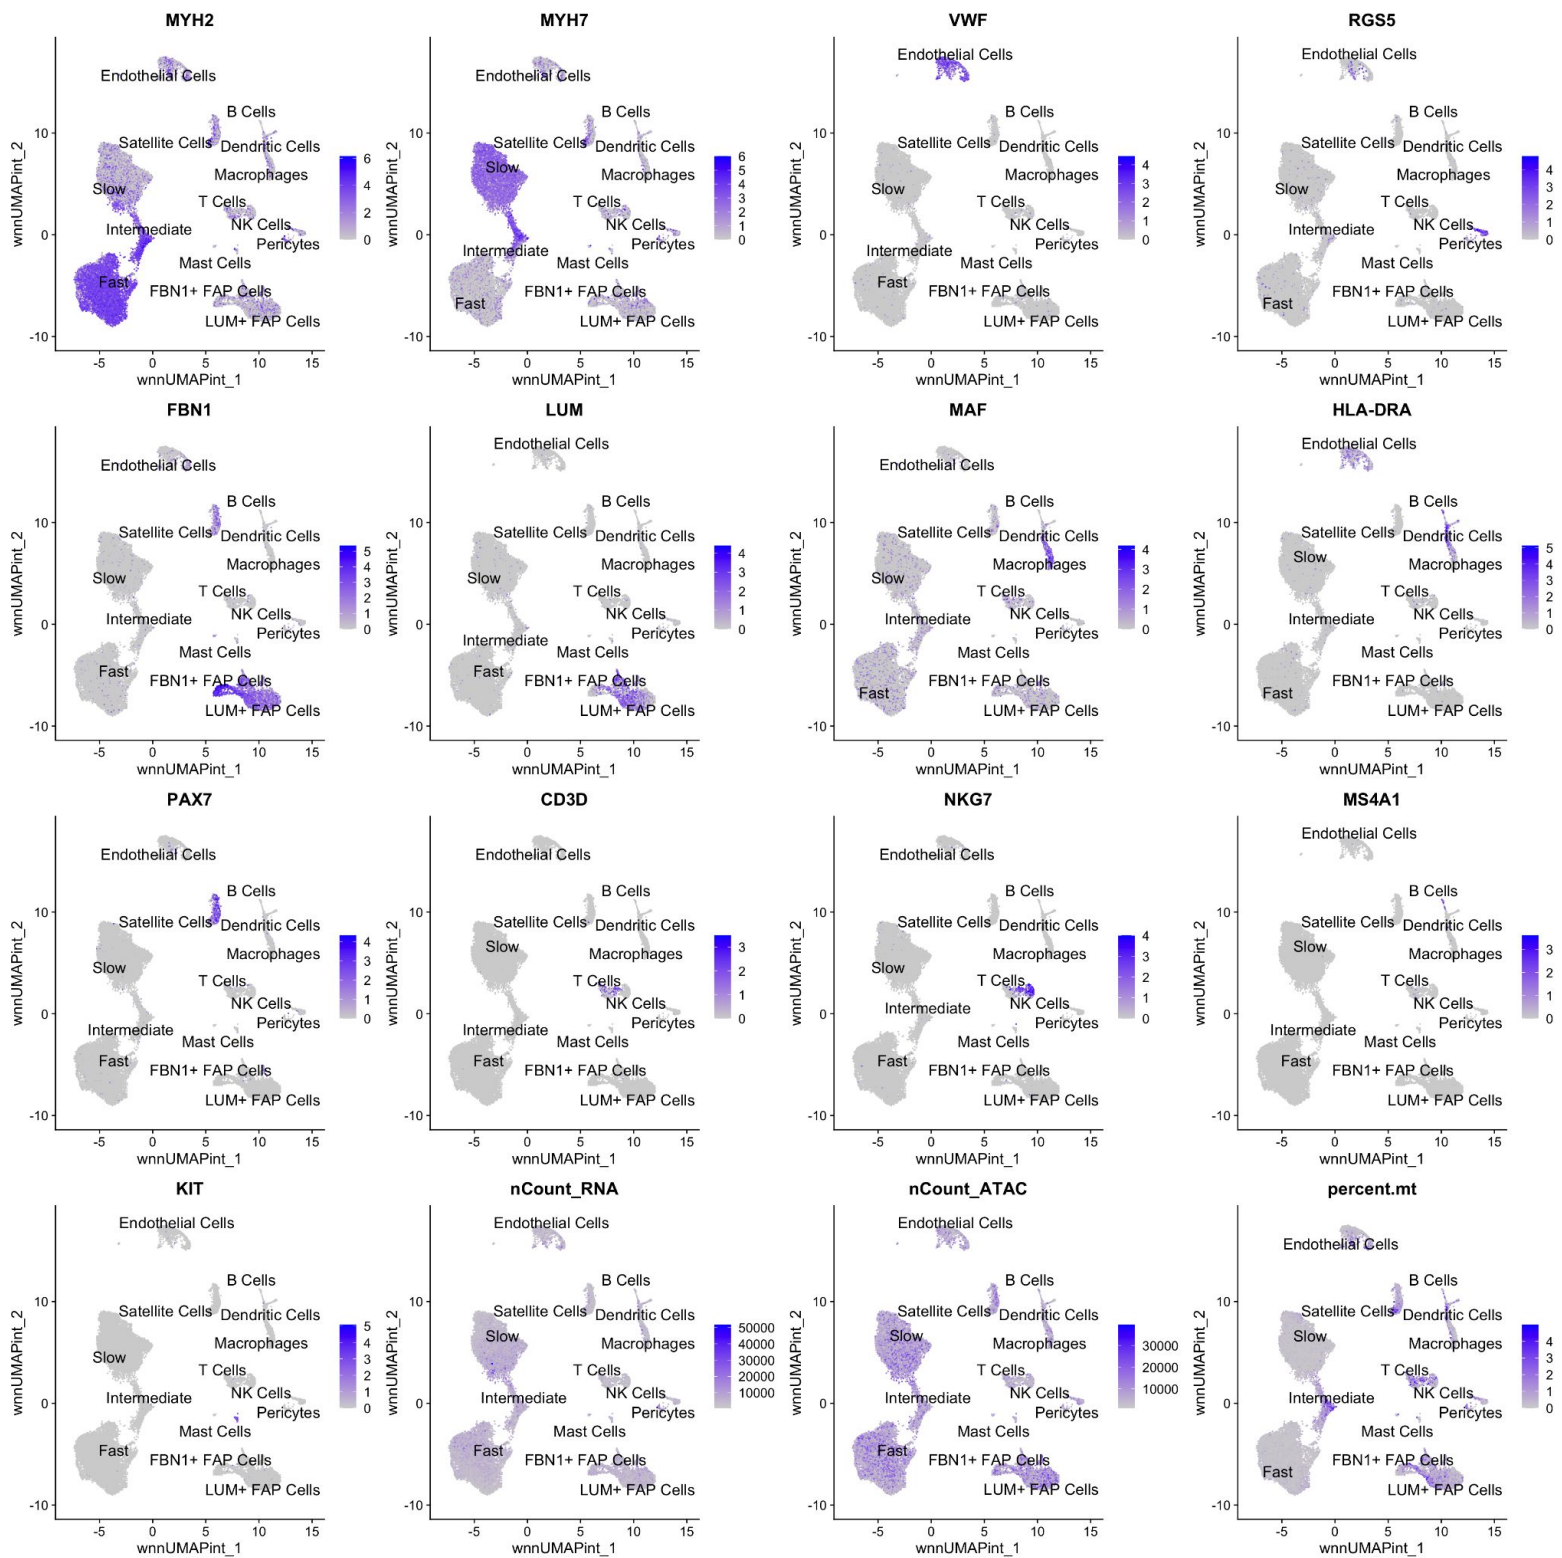

**Figure S1:** Single-cell primary processing: feature plots showing marker genes or QC metrics on the UMAP projection. Marker genes include *MYH2* (slow/intermediate), *MYH7* (fast/intermediate), *VWF* (endothelial cells), *RGS5* (pericytes), *FBN1* (FBN1+ FAP cells), *LUM* (LUM+ FAP cells), *MAF* (macrophages), *HLA-DRA* (dendritic cells), *PAX7* (satellite cells), *CD3D* (T cells), *NKG7* (NK cells), *MS4A1* (B cells), *KIT* (mast cells). QC metrics include *nCount\_RNA* (the number of RNA UMIs per cell), *nCount\_ATAC* (the number of ATAC UMIs per cell), and *percent.mt* (percentage of mitochondrial reads per cell).

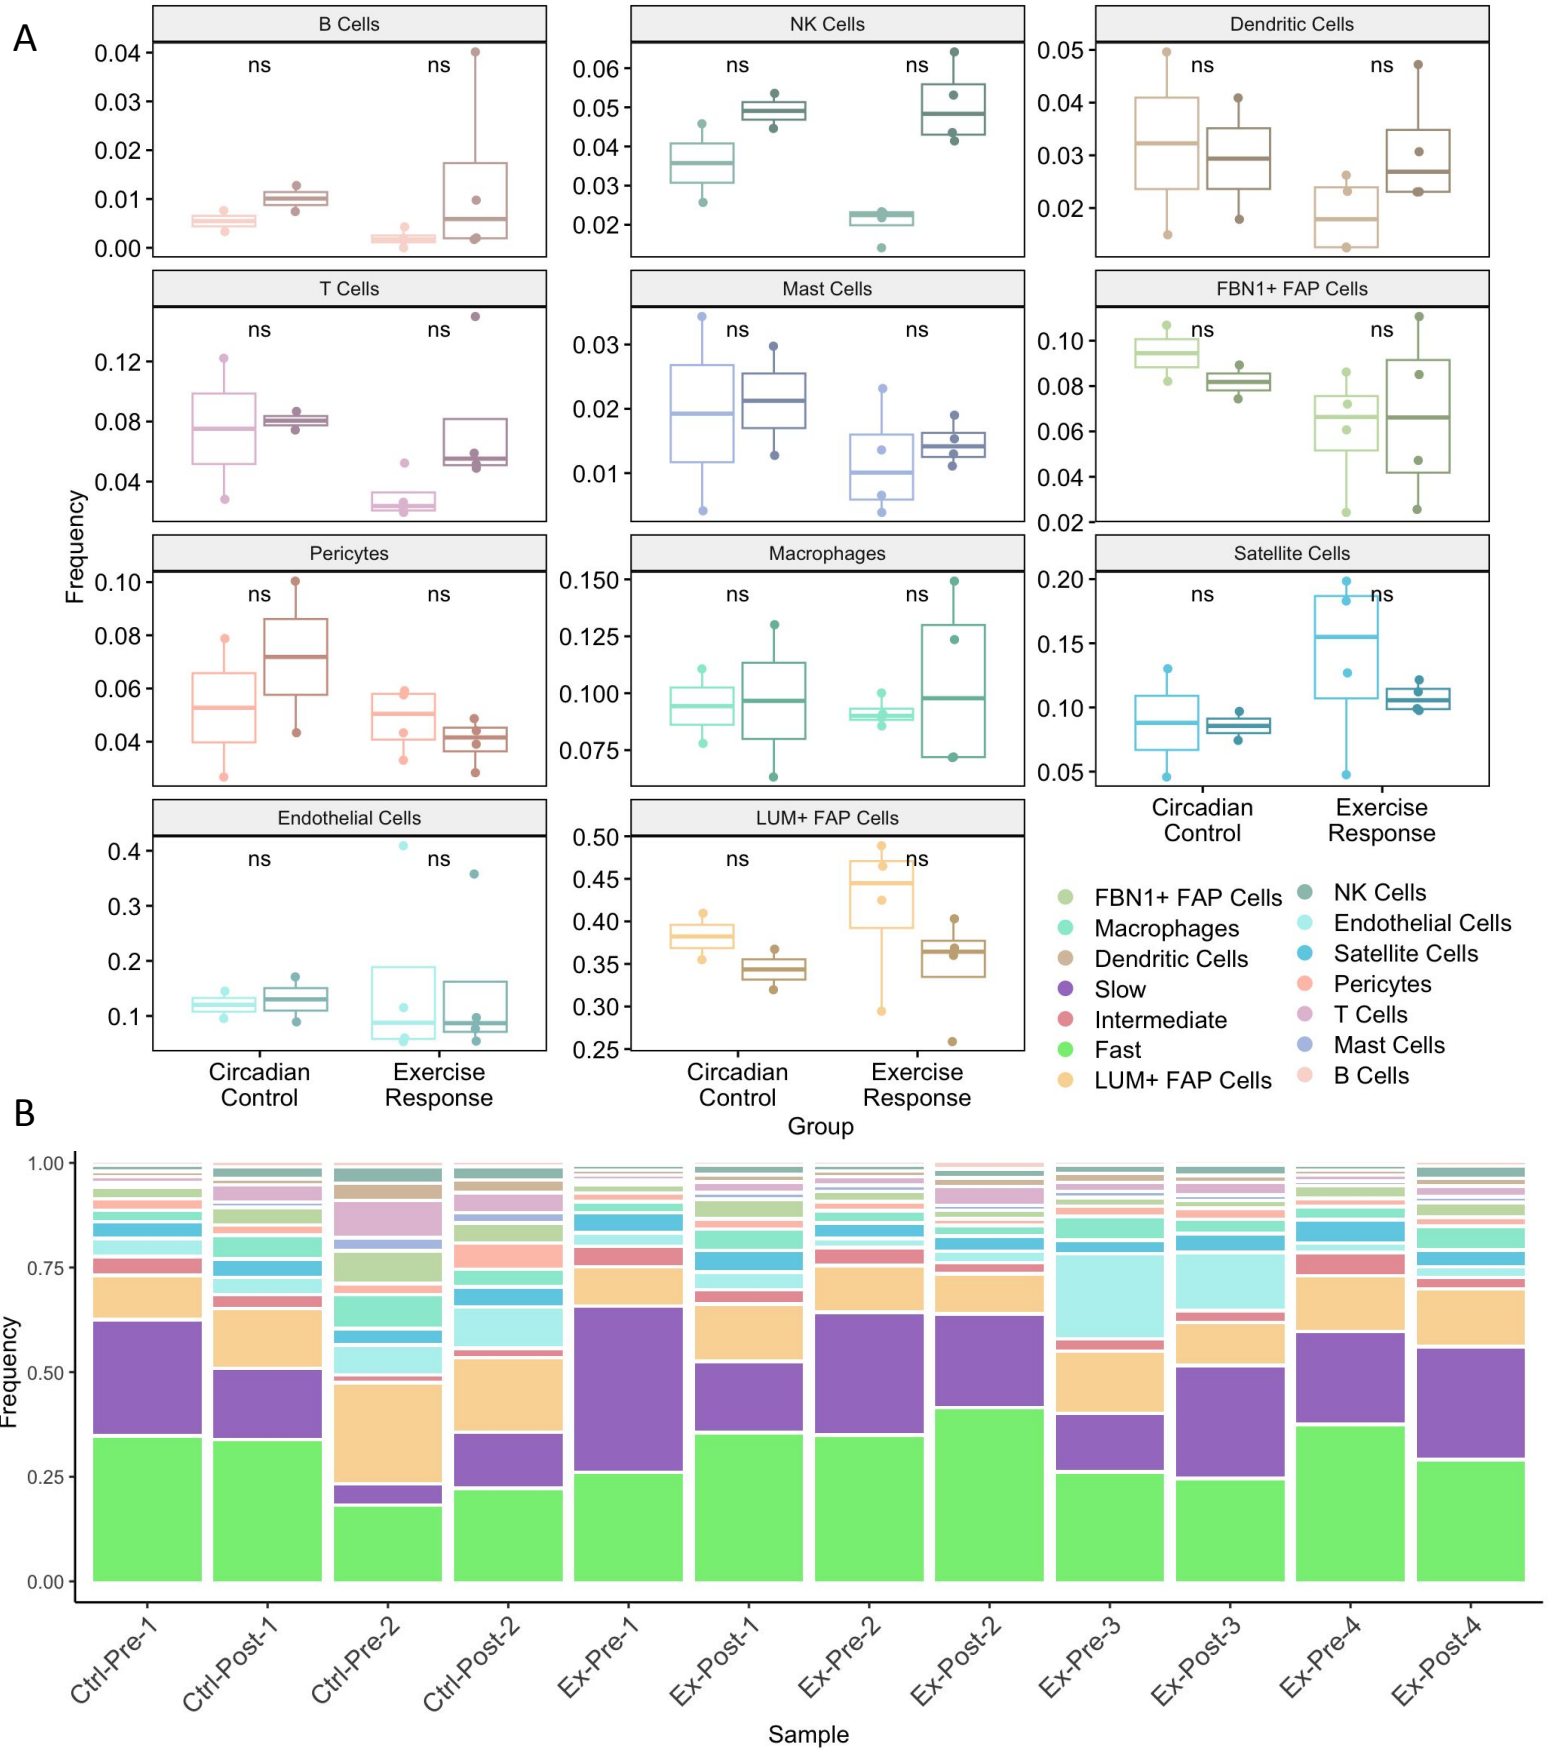

**Figure S2:** Cell-type proportions are roughly comparable between pre and post time-points. (A) Boxplots reveal frequency of each cell-type within each sample and are split by time-point and group ( $n = 2$  control samples per time-point and  $n = 4$  exercise samples per time-point). Colors denote cell-type with a darker tint indicating the post time-point. To enable more consistent comparison, fibers are excluded during computation of cell-type frequency. Change between pre and post cell-type proportions is assessed via Holm-Bonferroni adjusted paired t-test with ns:  $p > 0.05$ , \*:  $p \leq 0.05$ , \*\*:  $p \leq 0.01$ , \*\*\*:  $p \leq 0.001$ , \*\*\*\*:  $p \leq 0.0001$  (B) Barplot indicates frequency of each cell-type, including fibers, for each sample. Subjects Ctrl-1, Ex-1, and Ex-2 are female; subjects Ctrl-2, Ex-3, and Ex-4 are male.

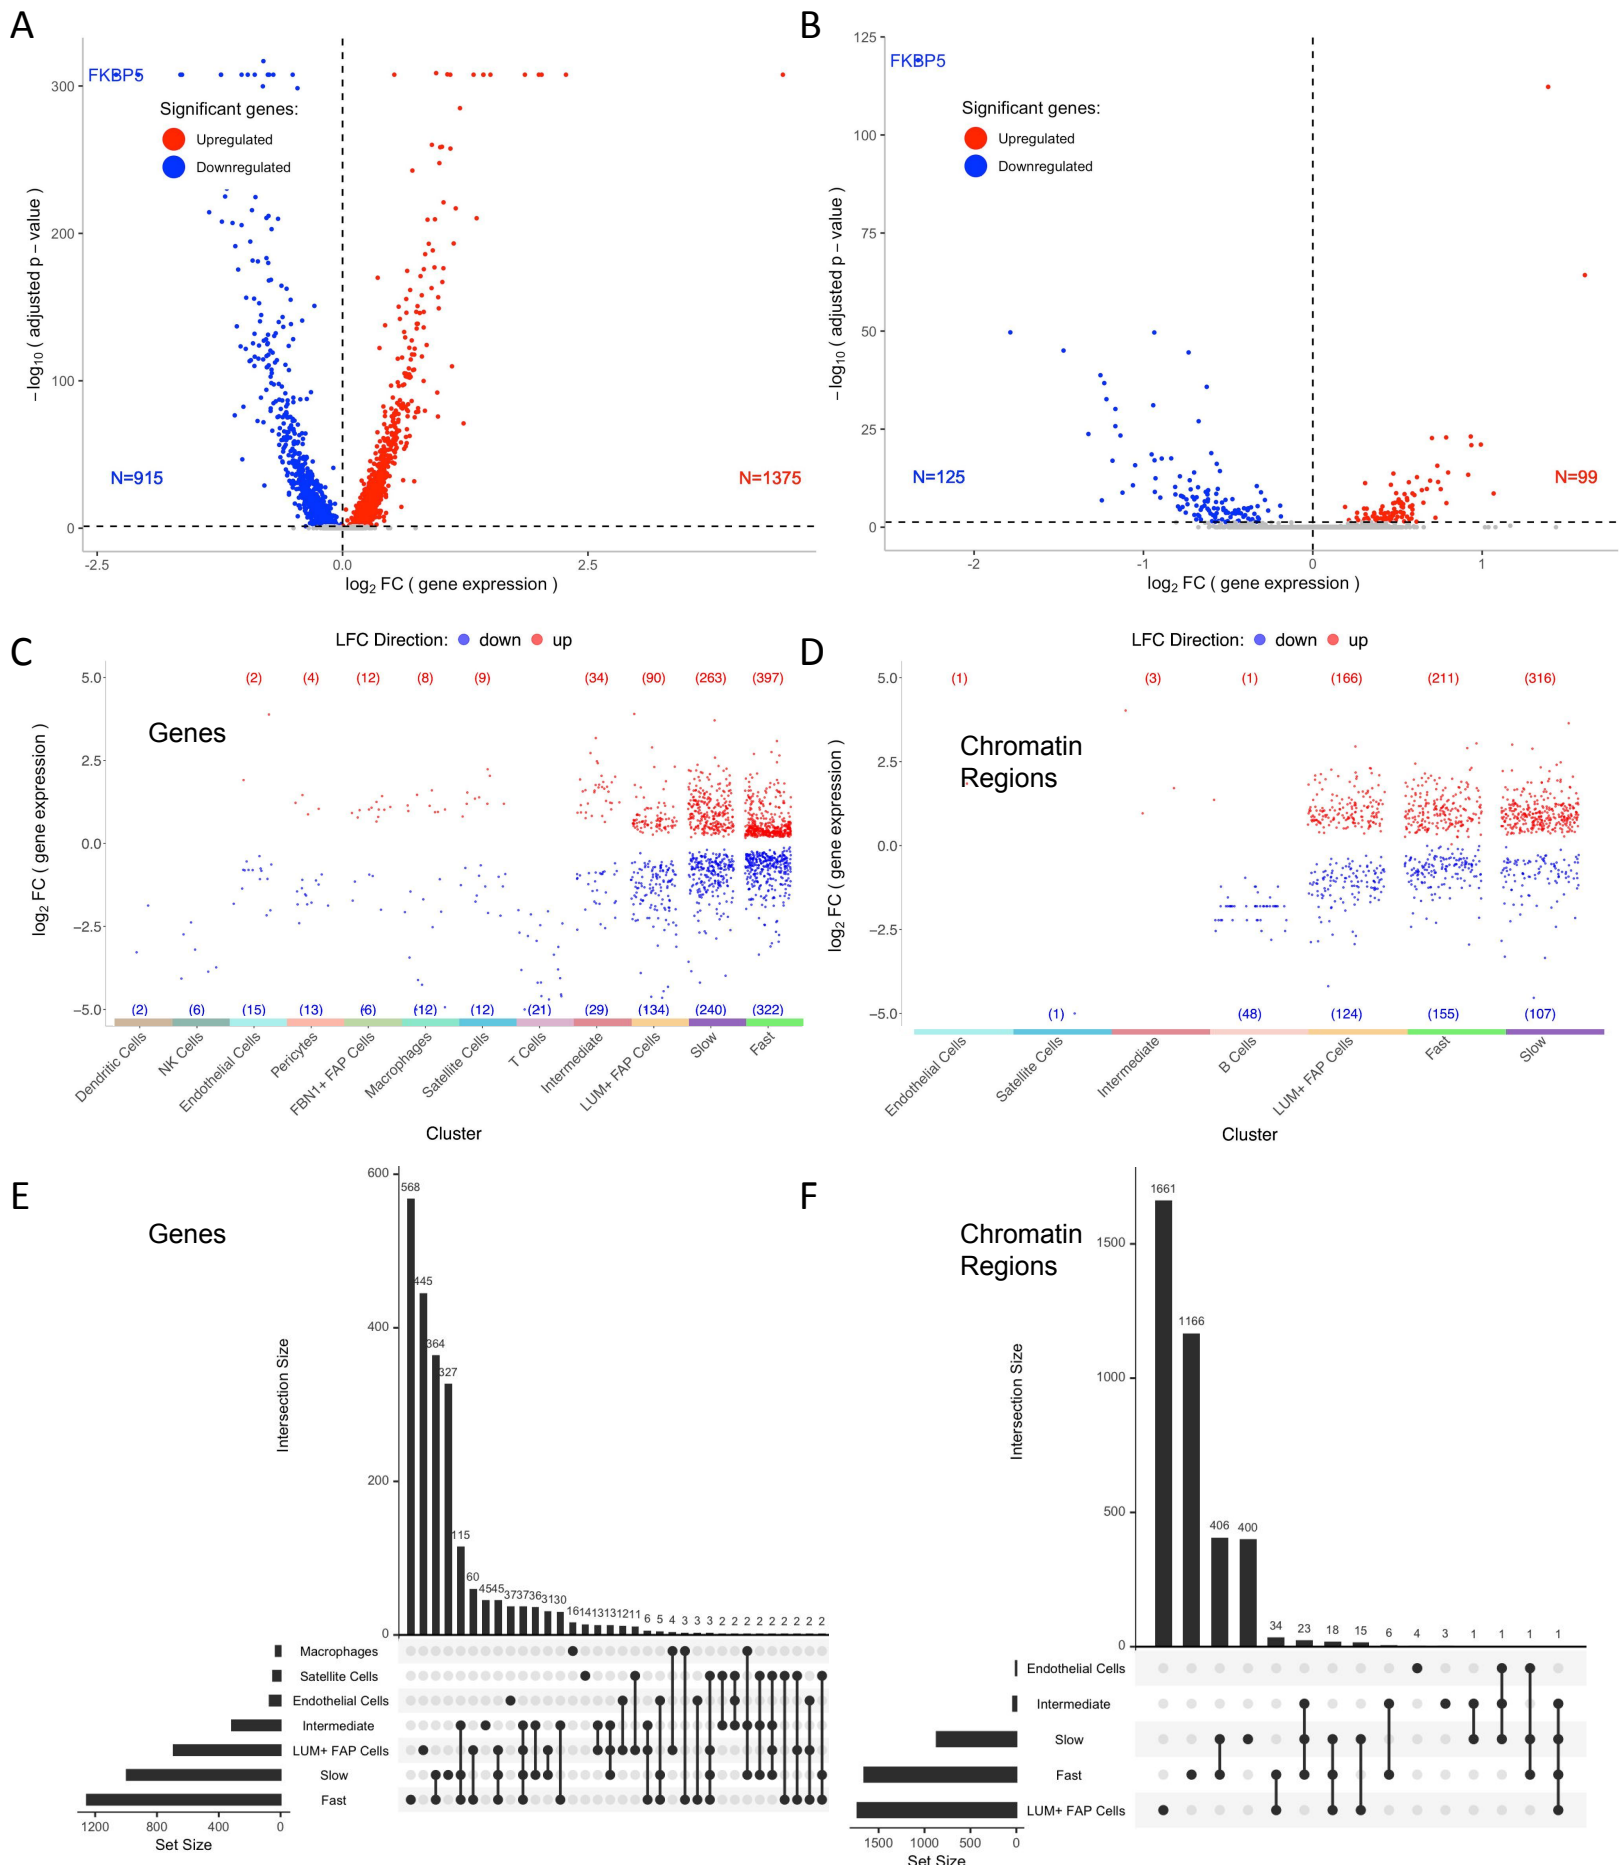

**Figure S3:** Differential analysis of circadian controls and overlaps of cell-type differential features. (A-B) Volcano plot showing differentially expressed genes pre vs. post (computed at single-cell resolution) for slow fibers in the exercise group (A) and control group (B). *FKBP5* is labeled in both panels and is highly significant with a  $\log_2$  fold change  $< -2$ . (C-D) Volcano plots show the distributions of upregulated and downregulated genes (C) and chromatin regions (D) for each cell-type in circadian controls. These are the features that were excluded from the set of exercise-response features prior to downstream analysis. (E-F) UpSet plots of DEG (E) and DAR (F). Cell-types with fewer than 10 differential features and intersections with 1 differential feature are not shown.

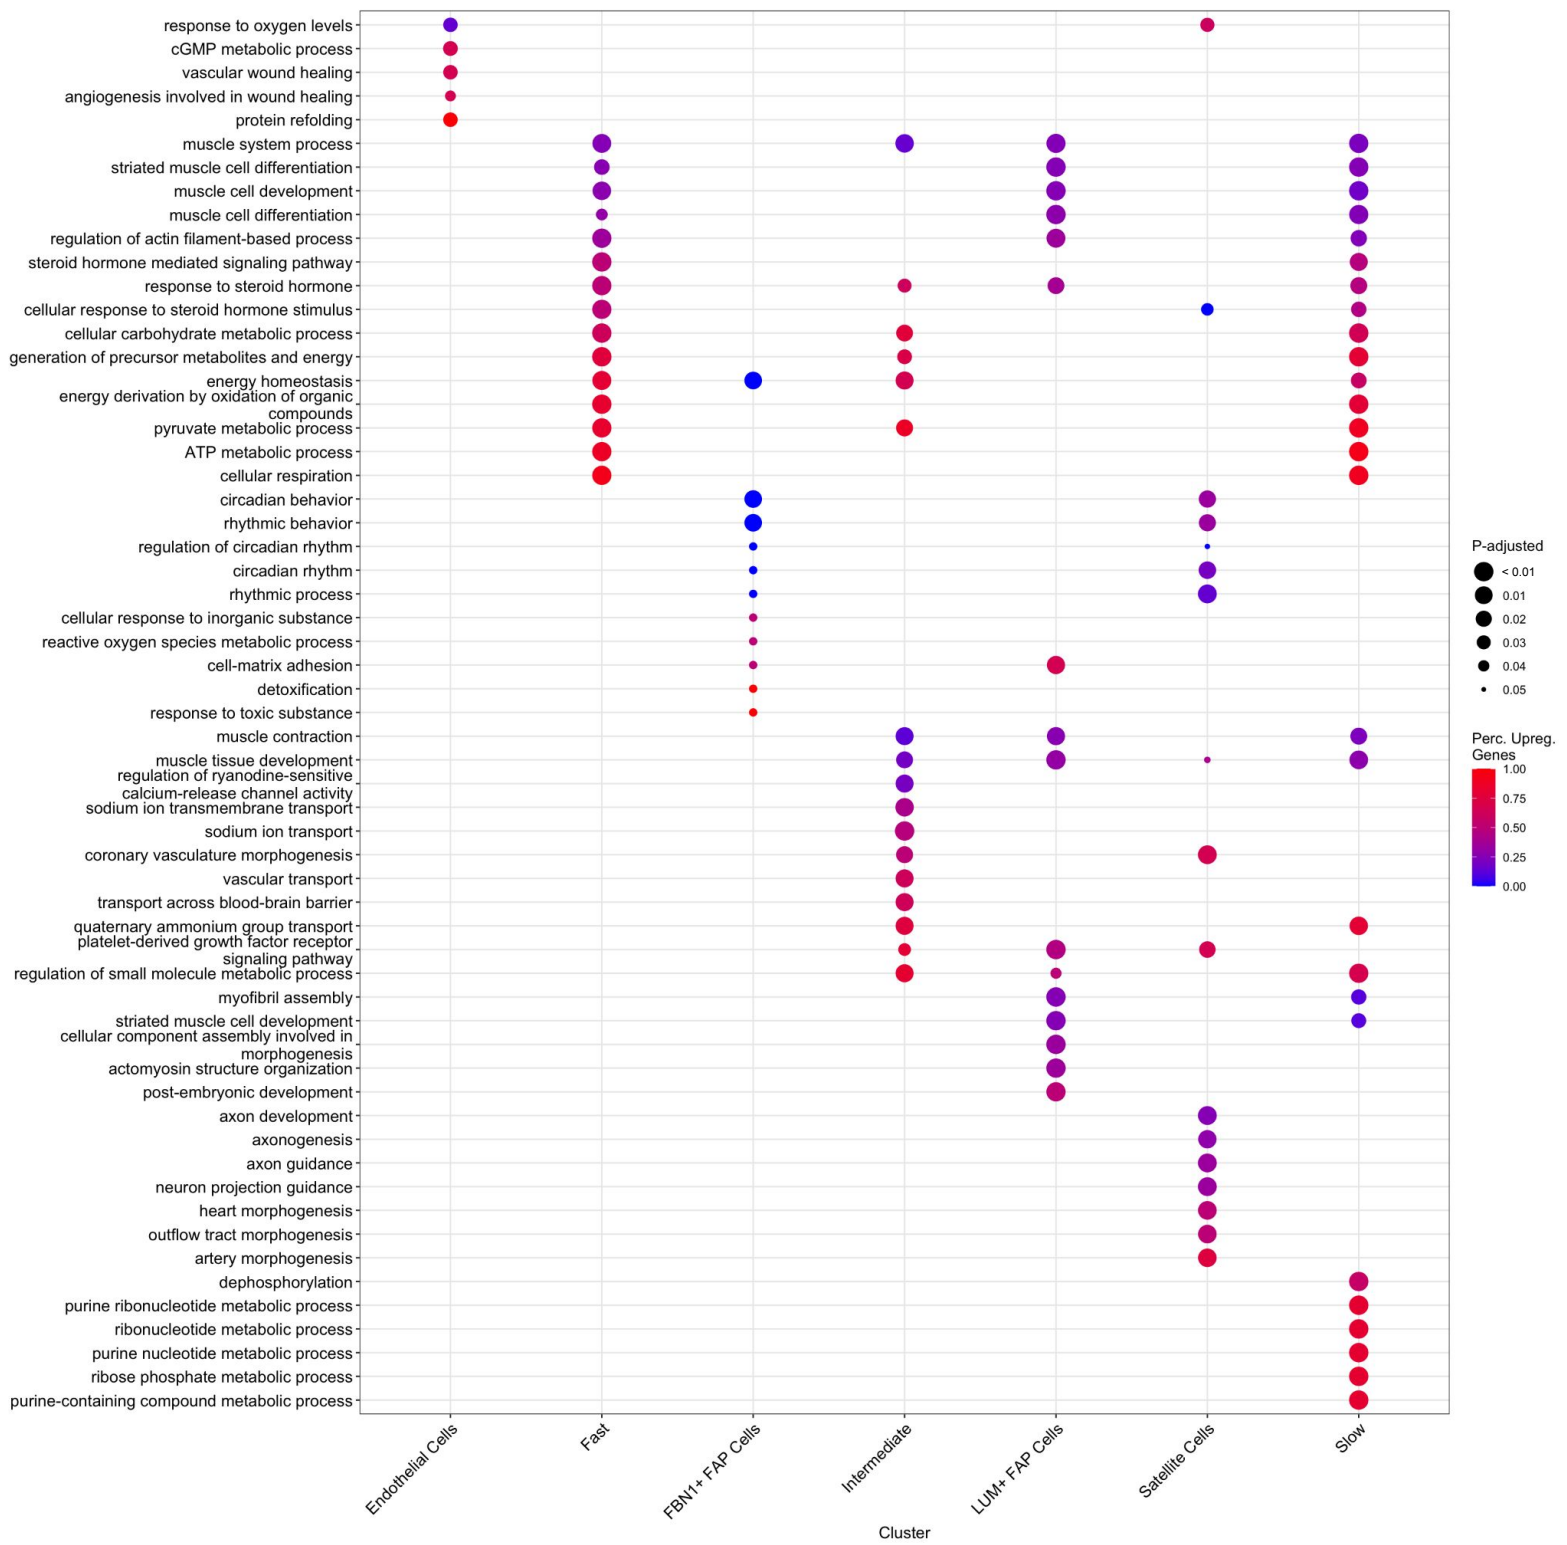

**Figure S4:** Enrichment analysis for all cell-types. Enrichment analysis of biological processes in each cell-type shows functionally different transcriptome profiles for each cell-type. Color represents the percentage of upregulated genes in a given pathway and larger dot radius denotes more significant biological function.



**A LV-defined expression patterns across RNA and ATAC Samples**

**B LVs with associated enriched pathways**

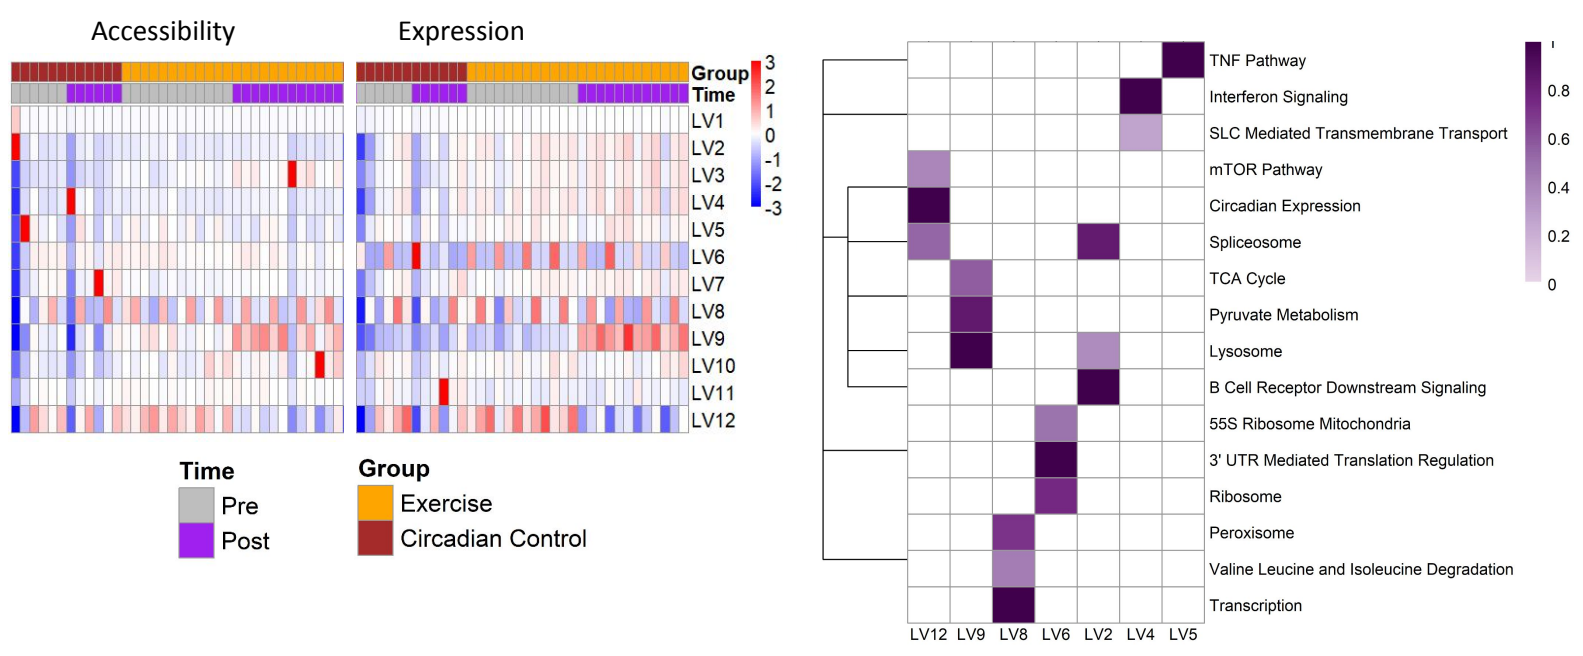

**Figure S5:** PLIER Supplementary Panels. (A) Heatmap represents summary values for all PLIER-identified LVs. Each column represents one fiber-type sample; columns are ordered by ome type, exercise group, and time-point. Each row represents one LV. (B) Heatmap of enriched pathways associated with select latent variables. Box color reflects AUC for association of pathway to LV.

**Supplementary Table S1: Subject Characteristics**

| <b>Subject</b> | <b>Sex</b> | <b>Group</b> | <b>Age</b> | <b>Height (cm)</b> | <b>Weight (kg)</b> | <b>BMI (kg·m<sup>2</sup>)</b> | <b>Body Fat %</b> | <b>Absolute VO<sub>2</sub>max(L/min)</b> | <b>Relative VO<sub>2</sub>max(ml/kg/min)</b> |
|----------------|------------|--------------|------------|--------------------|--------------------|-------------------------------|-------------------|------------------------------------------|----------------------------------------------|
| <b>E</b>       | F          | Exercise     | 23         | 173                | 72.90              | 24.4                          | 34.6              | 2.86                                     | 39.24                                        |
| <b>G</b>       | M          | Exercise     | 23         | 175                | 88.24              | 28.8                          | 24.4              | 3.49                                     | 39.57                                        |
| <b>I</b>       | F          | Exercise     | 26         | 164.2              | 68.9               | 25.6                          | 30.8              | 2.78                                     | 40.37                                        |
| <b>J</b>       | M          | Exercise     | 26         | 175                | 91.3               | 29.8                          | 33.1              | 4.31                                     | 47.24                                        |
| <b>L</b>       | M          | Control      | 23         | 184                | 82.7               | 24.4                          | 19.4              | 3.89                                     | 47.02                                        |
| <b>N</b>       | F          | Control      | 24         | 151                | 59.63              | 26.2                          | 34.6              | 3.03                                     | 50.76                                        |

BMI, body mass index; F, female; M, male; VO<sub>2</sub>max, maximal oxygen consumption.

**Supplementary Table S2: QC RNA-seq Metrics**

| <b>Subj</b> | <b>Time</b> | <b>Estimated number of nuclei</b> | <b>Mean reads/cell</b> | <b>Median UMI/cell</b> | <b>Median genes/cell</b> | <b>Reads mapped to transcriptome</b> | <b>Reads mapped to genome</b> | <b>Fraction of transcriptomic reads in cells</b> |
|-------------|-------------|-----------------------------------|------------------------|------------------------|--------------------------|--------------------------------------|-------------------------------|--------------------------------------------------|
| E           | 1.0         | 7960                              | 52666                  | 3906                   | 1727                     | 0.30                                 | 0.93                          | 0.80                                             |
| E           | 2.0         | 5391                              | 67791                  | 3865                   | 1841                     | 0.32                                 | 0.93                          | 0.77                                             |
| G           | 1.0         | 3003                              | 131480                 | 4386                   | 1950                     | 0.28                                 | 0.92                          | 0.80                                             |
| G           | 2.0         | 4335                              | 91301                  | 3328                   | 1660                     | 0.33                                 | 0.92                          | 0.78                                             |
| I           | 1.0         | 5854                              | 48101                  | 3660                   | 1652                     | 0.31                                 | 0.94                          | 0.84                                             |
| I           | 2.0         | 4608                              | 57218                  | 3356                   | 1678                     | 0.31                                 | 0.94                          | 0.80                                             |
| J           | 1.0         | 8772                              | 32451                  | 3797                   | 1780                     | 0.31                                 | 0.94                          | 0.85                                             |
| J           | 2.0         | 2524                              | 109593                 | 3944                   | 1874                     | 0.35                                 | 0.94                          | 0.81                                             |
| L           | 1.0         | 632                               | 667124                 | 4788                   | 2115                     | 0.41                                 | 0.91                          | 0.61                                             |
| L           | 2.0         | 961                               | 502041                 | 4531                   | 2035                     | 0.49                                 | 0.91                          | 0.49                                             |
| N           | 1.0         | 6499                              | 67568                  | 4064                   | 1805                     | 0.34                                 | 0.93                          | 0.72                                             |
| N           | 2.0         | 1372                              | 557108                 | 5070                   | 2194                     | 0.29                                 | 0.92                          | 0.71                                             |

**Supplementary Table S3: QC ATAC-seq Metrics**

| <b>Subj</b> | <b>Time</b> | <b>Median high-quality fragments/cell</b> | <b>Fraction of transposition events in peaks in cells</b> | <b>Number of peaks</b> | <b>Fraction of genome in peaks</b> | <b>TSS enrichment score</b> | <b>Confidently mapped read pairs</b> | <b>Fraction of high quality fragments overlapping peaks</b> |
|-------------|-------------|-------------------------------------------|-----------------------------------------------------------|------------------------|------------------------------------|-----------------------------|--------------------------------------|-------------------------------------------------------------|
| E           | 1           | 18055                                     | 0.332                                                     | 84518                  | 0.023                              | 5.47                        | 0.93                                 | 0.33                                                        |
| E           | 2           | 20117                                     | 0.320                                                     | 78916                  | 0.022                              | 5.02                        | 0.93                                 | 0.32                                                        |
| G           | 1           | 25973                                     | 0.378                                                     | 97398                  | 0.027                              | 6.09                        | 0.92                                 | 0.38                                                        |
| G           | 2           | 18539                                     | 0.314                                                     | 75830                  | 0.021                              | 4.74                        | 0.92                                 | 0.31                                                        |
| I           | 1           | 10428.5                                   | 0.347                                                     | 92023                  | 0.026                              | 6.27                        | 0.94                                 | 0.38                                                        |
| I           | 2           | 8209                                      | 0.188                                                     | 54498                  | 0.015                              | 4.24                        | 0.93                                 | 0.21                                                        |
| J           | 1           | 10601                                     | 0.348                                                     | 100678                 | 0.028                              | 6.05                        | 0.94                                 | 0.38                                                        |
| J           | 2           | 25056                                     | 0.314                                                     | 83645                  | 0.023                              | 5.16                        | 0.93                                 | 0.34                                                        |
| L           | 1           | 26888.5                                   | 0.208                                                     | 35652                  | 0.010                              | 3.77                        | 0.91                                 | 0.21                                                        |
| L           | 2           | 21707                                     | 0.156                                                     | 29919                  | 0.008                              | 3.28                        | 0.91                                 | 0.16                                                        |
| N           | 1           | 10489                                     | 0.378                                                     | 92724                  | 0.026                              | 6.50                        | 0.93                                 | 0.38                                                        |
| N           | 2           | 23827                                     | 0.344                                                     | 66074                  | 0.018                              | 5.09                        | 0.92                                 | 0.34                                                        |



**Supplementary Table S4: PPAR $\delta$  Targets**

| Cell type  | PPAR $\delta$ targets                                                                                                                                                                                                                                                                                                                                                                                                                                                                                                                                                                                                                                                                                                                                                                                                                                                                                                                                                                                                                                                                                                                                                                                                                                                                                                                                                                                                                                                                                                                                                                                                                                                                                                                                                                                                                                                                                                                                                          |
|------------|--------------------------------------------------------------------------------------------------------------------------------------------------------------------------------------------------------------------------------------------------------------------------------------------------------------------------------------------------------------------------------------------------------------------------------------------------------------------------------------------------------------------------------------------------------------------------------------------------------------------------------------------------------------------------------------------------------------------------------------------------------------------------------------------------------------------------------------------------------------------------------------------------------------------------------------------------------------------------------------------------------------------------------------------------------------------------------------------------------------------------------------------------------------------------------------------------------------------------------------------------------------------------------------------------------------------------------------------------------------------------------------------------------------------------------------------------------------------------------------------------------------------------------------------------------------------------------------------------------------------------------------------------------------------------------------------------------------------------------------------------------------------------------------------------------------------------------------------------------------------------------------------------------------------------------------------------------------------------------|
| Fast fiber | <p>ADORA2A-AS1, P4HA2-AS1, DPP6, C16orf46, TBC1D1, PTTG2, FABP3, PTPRG, CCDC197, RELL1, SERPINB9, ACKR3, SLC25A18, SLC26A9, VEGFA, CASTOR2, SPIRE1, IQCC, RNF144B, TFEB, SERINC2, ANGPTL2, MBP, CDHR3, SLC41A1, SLC38A4, RFTN1, RAB29, ITIH6, RAB7B, RHBDF1, MOCS1, MIA2, PHKG1, STC2, PTPRJ, SLC30A2, FAM83E, PDE11A, CDS2, ADM, OLFM1, RTN4RL1, LANCL1-AS1, NDRG1, GCOM1, CDKN1A, SLC22A23, SLC22A5, TMEM52, HADHB, LARGE-AS1, CES3, SPTBN4, RSPH9, C3orf35, CREB3L2, MID1IP1, SH3BP2, EML1, ZNF366, PSMG4, CPEB4, C4orf19, FAM43A, VGLL2, TMEM164, MIR3936HG, UQCRFS1, LIMD1-AS1, RIPOR1, DAAM2, LARGE1, RRS1, HHATL, POR, ZBTB43, ABCC1, ANKRD9, ERAP1, TSPAN9, PARVA, KLHL40, PSMD8, RANBP10, IGF2R, TMEM140, SCARF1, TRAF5, TECPR2, PPTC7, SLC25A5, DHDDS, KCNC1, LINC01968, SLC16A1-AS1, CALML6, IAH1, SOCS7, FARP1, RAB11FIP3, GANC, SAMD4A, HIVEP2, SLC22A4, ASAP3, DNAJA4, DLGAP4-AS1, IBTK, ZCCHC17, EIF4EBP2, ZMIZ1, NAGLU, SFMBT1, TNS3, CCDC13, CLIP4, KIF13A, MPC1, NCR3LG1, COLQ, RHOBTB2, DLGAP4, RAD9B, C19orf12, EPS15L1, TKT, UBE2O, ABHD3, PTC3, GOLGA4, RBMS3-AS3, CRK, AFG3L2, LINC01909, RGS3, OSBPL2, MIR1-1HG, NODAL, RBM38, ZNF385C, PRKCD, LGALS1, PDCD11, SLC22A1, DEK, GBF1, ADHFE1, ABCC8, PIM1, PRAG1, ARMH3, TOGARAM2, IDI2-AS1, SPECC1L, FKBP9, SEPTIN11, CD79A, ZBED6, SH3KBP1, GPR179, LCA5L, PARM1, LINC01754, PALMD, RETSAT, WDR60, CHD2, STAT3, SETD3, ITGB1BP1, SLC37A1, PITPNM2, ACSBG1, BCL2L14, PREB, PAFAH2, PARVB, SLC11A2, SGSM1, C16orf70, PTPN3, MTHFD1, ACACB, SLC4A4, MAN1C1, FNBP1L, ATP5MG, RILPL1, DUS2, NCOA3, GREB1L, JMJD6, UBAC1, ZNF609, FAM181A, ETV6, SLC31A1, LRIG2-DT, PHF20, DPEP2, CES2, PLAGL1, CLIC5, SLC29A1, BCAT2, ATP5MD, MTCH2, CEP68, GLCC1, SNHG1, LACTB, ABHD2, CIAO2A, CFL2, CAMSAP1, RHBDF2, MIOS, CCDC28B, ZCWPW2, ANKRD28, HSPB1, DHRS7C, SELENON, PLEKHA4, SLC66A2, WDR37, PFKFB1, CGREF1, ABHD1, ARHGEF10L, GEM, MIPEP, ANP32A, STK24, GPR157, RDH5, SH2B3, TBC1D22A, PDCD10, GREB1, PPP4C</p> |
| Slow fiber | <p>CGREF1, KLF13, CNNM1, TKT, GCOM1, JUNB, LINC00598, AMOTL1, IDH3A, ACSBG1, PREB, TRIM63, GDAP1L1, NRP1, STAT3, CCM2, ZMIZ1, ACOT11, MAP4K3-DT, SLC41A1, UBAC1, FAM151A, NOP16, PKIG, ZNF44, ATP5MG, EPDR1, GOT1, HOOK2</p>                                                                                                                                                                                                                                                                                                                                                                                                                                                                                                                                                                                                                                                                                                                                                                                                                                                                                                                                                                                                                                                                                                                                                                                                                                                                                                                                                                                                                                                                                                                                                                                                                                                                                                                                                   |
